# Supplementary material for: Exposure-associated Health Implications of Potential Toxic Elements in Maternal and Umbilical Cord Blood at Ishaka Adventist Hospital, Uganda
Source: Research Square preprint supplement (doi:10.21203/rs.3.rs-7322101/v1), 2025-08-27
Supplement: Supplementary file 1 [file 24199eb228f8780b7ea94c72.docx]

**Table S1: Descriptive statistics of metal concentrations in maternal and cord blood samples**

| **Category** | | **PTEs** | **Mean (ppm)** | | **SD** | **Median (ppm)** | **Min (ppm)** | **Max (ppm)** |
| --- | --- | --- | --- | --- | --- | --- | --- | --- |
| **Maternal blood** | | As | 0.0106 | | 0.0139 | 0.0000 | 0.0000 | 0.0400 |
| Pb | 0.0681 | | 0.0247 | 0.0500 | 0.0500 | 0.1200 |
| Cr | 0.0331 | | 0.0138 | 0.0400 | 0.0200 | 0.0800 |
| Ni | 0.0256 | | 0.0164 | 0.0300 | 0.0000 | 0.0500 |
| Cu | 0.0456 | | 0.0211 | 0.0400 | 0.0300 | 0.1000 |
| Zn | 0.5156 | | 0.1868 | 0.5000 | 0.2000 | 0.8000 |
| Fe | 10.6141 | | 2.3550 | 10.3900 | 5.2900 | 15.6600 |
| **Cord blood** | As | | | 0.0041 | 0.0050 | 0.0000 | 0.0000 | 0.0100 |
| Pb | | | 0.0344 | 0.0152 | 0.0250 | 0.0200 | 0.0600 |
| Cr | | | 0.0163 | 0.0066 | 0.0200 | 0.0100 | 0.0400 |
| Ni | | | 0.0084 | 0.0057 | 0.0100 | 0.0000 | 0.0200 |
| Cu | | | 0.0209 | 0.0123 | 0.0200 | 0.0100 | 0.0500 |
| Zn | | | 0.0516 | 0.0187 | 0.0500 | 0.0200 | 0.0800 |
| Fe | | | 5.2944 | 1.2043 | 5.1950 | 2.2900 | 7.8300 |

n = 32; p < 0.05

**Table S2: Concentration of heavy metals (ppm) in umbilical cord blood samples (n = 32)**

| **Sample** | **As** | **Cd** | **Cr** | **Cu** | **Fe** | **Ni** | **Pb** | **Zn** |
| --- | --- | --- | --- | --- | --- | --- | --- | --- |
| IAB 1 | 0.00 | 0.00 | 0.02 | 0.01 | 4.92 | 0.00 | 0.02 | 0.07 |
| IAB 2 | 0.01 | 0.00 | 0.01 | 0.01 | 4.35 | 0.01 | 0.02 | 0.05 |
| IAB 3 | 0.01 | 0.00 | 0.01 | 0.02 | 7.30 | 0.00 | 0.02 | 0.05 |
| IAB 4 | 0.00 | 0.00 | 0.01 | 0.01 | 5.01 | 0.01 | 0.02 | 0.08 |
| IAB 5 | 0.01 | 0.00 | 0.01 | 0.01 | 4.68 | 0.01 | 0.02 | 0.04 |
| IAB 6 | - | - | 0.01 | 0.02 | 6.10 | 0.00 | 0.02 | 0.07 |
| IAB 7 | 0.01 | 0.00 | 0.02 | 0.01 | 6.54 | 0.02 | 0.02 | 0.05 |
| IAB 8 | 0.01 | 0.00 | 0.01 | 0.01 | 5.59 | 0.00 | 0.03 | 0.05 |
| IAB 9 | 0.00 | 0.00 | 0.01 | 0.01 | 5.35 | 0.01 | 0.02 | 0.08 |
| IAB 10 | 0.01 | 0.00 | 0.01 | 0.01 | 7.83 | 0.00 | 0.04 | 0.05 |
| IAB 11 | 0.00 | 0.00 | 0.02 | 0.01 | 4.54 | 0.01 | 0.02 | 0.05 |
| IAB 12 | 0.00 | 0.00 | 0.01 | 0.01 | 3.37 | 0.00 | 0.02 | 0.04 |
| IAB 13 | 0.01 | 0.00 | 0.04 | 0.01 | 4.82 | 0.02 | 0.02 | 0.08 |
| IAB 14 | 0.00 | 0.00 | 0.01 | 0.01 | 3.34 | 0.01 | 0.02 | 0.04 |
| IAB 15 | 0.00 | 0.00 | 0.01 | 0.02 | 4.09 | 0.02 | 0.02 | 0.07 |
| IAB 16 | 0.00 | 0.00 | 0.02 | 0.05 | 7.36 | 0.01 | 0.05 | 0.06 |
| IAB 17 | 0.01 | 0.00 | 0.01 | 0.02 | 4.62 | 0.00 | 0.02 | 0.06 |
| IAB 18 | 0.00 | 0.00 | 0.02 | 0.03 | 5.02 | 0.01 | 0.05 | 0.04 |
| IAB 19 | 0.00 | 0.00 | 0.01 | 0.02 | 2.29 | 0.00 | 0.02 | 0.02 |
| IAB 20 | - | - | 0.02 | 0.03 | 5.61 | 0.01 | 0.05 | 0.04 |
| IAB 21 | 0.01 | - | 0.02 | 0.03 | 5.20 | 0.01 | 0.05 | 0.04 |
| IAB 22 | - | - | 0.02 | 0.02 | 5.19 | 0.01 | 0.05 | 0.03 |
| IAB 23 | 0.01 | - | 0.02 | 0.02 | 5.46 | 0.01 | 0.05 | 0.05 |
| IAB 24 | - | - | 0.02 | 0.03 | 4.77 | 0.01 | 0.05 | 0.03 |
| IAB 25 | - | - | 0.02 | 0.05 | 7.51 | 0.01 | 0.06 | 0.08 |
| IAB 26 | 0.01 | - | 0.02 | 0.02 | 5.66 | 0.01 | 0.05 | 0.08 |
| IAB 27 | - | - | 0.01 | 0.01 | 5.60 | 0.01 | 0.02 | 0.05 |
| IAB 28 | - | - | 0.02 | 0.03 | 6.24 | 0.01 | 0.05 | 0.04 |
| IAB 29 | 0.01 | - | 0.02 | 0.02 | 5.61 | 0.01 | 0.05 | 0.03 |
| IAB 30 | - | - | 0.02 | 0.03 | 4.88 | 0.01 | 0.05 | 0.02 |
| IAB 31 | 0.01 | - | 0.02 | 0.03 | 5.74 | 0.01 | 0.05 | 0.08 |
| IAB 32 | - | - | 0.02 | 0.05 | 4.83 | 0.01 | 0.05 | 0.03 |

**Table S3: Concentration of heavy metals (ppm) in maternal blood samples (n = 32)**

| **Sample** | **As** | **Cd** | **Cr** | **Cu** | **Fe** | **Ni** | **Pb** | **Zn** |
| --- | --- | --- | --- | --- | --- | --- | --- | --- |
| IAM 1 | 0 | 0 | 0.04 | 0.03 | 9.84 | 0 | 0.05 | 0.70 |
| IAM 2 | 0.03 | 0 | 0.02 | 0.03 | 8.70 | 0.03 | 0.05 | 0.50 |
| IAM 3 | 0.03 | 0 | 0.02 | 0.04 | 14.60 | 0 | 0.05 | 0.50 |
| IAM 4 | 0 | 0 | 0.02 | 0.03 | 10.02 | 0.03 | 0.05 | 0.80 |
| IAM 5 | 0.03 | 0 | 0.02 | 0.03 | 9.36 | 0.03 | 0.05 | 0.40 |
| IAM 6 | 0 | 0 | 0.02 | 0.04 | 12.20 | 0 | 0.05 | 0.70 |
| IAM 7 | 0.03 | 0 | 0.04 | 0.03 | 13.08 | 0.05 | 0.05 | 0.50 |
| IAM 8 | 0.02 | 0 | 0.02 | 0.03 | 11.18 | 0 | 0.07 | 0.50 |
| IAM 9 | 0 | 0 | 0.02 | 0.03 | 10.70 | 0.03 | 0.05 | 0.80 |
| IAM 10 | 0.02 | 0 | 0.02 | 0.03 | 15.66 | 0 | 0.09 | 0.50 |
| IAM 11 | 0 | 0 | 0.04 | 0.03 | 9.08 | 0.03 | 0.05 | 0.50 |
| IAM 12 | 0 | 0 | 0.02 | 0.03 | 6.74 | 0 | 0.05 | 0.40 |
| IAM13 | 0.02 | 0 | 0.08 | 0.03 | 9.64 | 0.05 | 0.05 | 0.80 |
| IAM 14 | 0 | 0 | 0.02 | 0.03 | 6.68 | 0.03 | 0.05 | 0.40 |
| IAM 15 | 0 | 0 | 0.02 | 0.04 | 8.18 | 0.05 | 0.05 | 0.70 |
| IAM 16 | 0 | 0 | 0.06 | 0.10 | 14.72 | 0.03 | 0.10 | 0.60 |
| IAM 17 | 0.04 | 0 | 0.02 | 0.05 | 9.24 | 0 | 0.05 | 0.60 |
| IAM 18 | 0 | 0 | 0.04 | 0.03 | 10.04 | 0.03 | 0.10 | 0.40 |
| IAM 19 | 0 | 0 | 0.03 | 0.05 | 5.29 | 0 | 0.05 | 0.20 |
| IAM 20 | 0 | 0 | 0.04 | 0.06 | 11.22 | 0.03 | 0.10 | 0.40 |
| IAM 21 | 0.02 | 0 | 0.04 | 0.06 | 10.40 | 0.03 | 0.05 | 0.40 |
| IAM 22 | 0 | 0 | 0.04 | 0.04 | 10.38 | 0.04 | 0.05 | 0.30 |
| IAM 23 | 0.04 | 0 | 0.04 | 0.04 | 10.92 | 0.03 | 0.05 | 0.50 |
| IAM 24 | 0 | 0 | 0.04 | 0.06 | 9.54 | 0.03 | 0.05 | 0.30 |
| IAM 25 | 0 | 0 | 0.03 | 0.10 | 15.02 | 0.03 | 0.12 | 0.80 |
| IAM 26 | 0.02 | 0 | 0.04 | 0.04 | 11.32 | 0.05 | 0.10 | 0.80 |
| IAM 27 | 0 | 0 | 0.02 | 0.03 | 11.20 | 0.03 | 0.05 | 0.50 |
| IAM 28 | 0 | 0 | 0.04 | 0.06 | 12.48 | 0.03 | 0.10 | 0.40 |
| IAM 29 | 0.02 | 0 | 0.04 | 0.04 | 11.32 | 0.03 | 0.10 | 0.30 |
| IAM 30 | 0 | 0 | 0.04 | 0.06 | 9.76 | 0.03 | 0.10 | 0.20 |
| IAM 31 | 0.02 | 0 | 0.04 | 0.06 | 11.48 | 0.04 | 0.10 | 0.80 |
| IAM 32 | 0 | 0 | 0.04 | 0.10 | 9.66 | 0.03 | 0.10 | 0.30 |

**Table S4: Weighted risk scores and risk categories based on maternal and cord blood metal concentrations**

| **Neonate ID** | **Pb** | **As** | **Cr** | **Ni** | **Cu** | **Zn** | **Fe** | **WRST** | **Risk category** |
| --- | --- | --- | --- | --- | --- | --- | --- | --- | --- |
| N01 | 1.667 | NDc | 2.000 | NDc | 0.400 | 0.875 | 0.628 | 5.570 | Moderate |
| N02 | 1.667 | 5.000 | 1.000 | 1.500 | 0.400 | 0.625 | 0.556 | 10.748 | High |
| N03 | 1.667 | 5.000 | 1.000 | NDc | 0.800 | 0.625 | 0.932 | 10.024 | High |
| N04 | 1.667 | NDc | 1.000 | 1.500 | 0.400 | 1.000 | 0.640 | 6.207 | Moderate |
| N05 | 1.667 | 5.000 | 1.000 | 1.500 | 0.400 | 0.500 | 0.598 | 10.665 | High |
| N06 | 1.667 | NDc | 1.000 | NDc | 0.800 | 0.875 | 0.779 | 5.121 | Moderate |
| N07 | 1.667 | 5.000 | 2.000 | 3.000 | 0.400 | 0.625 | 0.830 | 13.522 | High |
| N08 | 2.500 | 5.000 | 1.000 | NDc | 0.400 | 0.625 | 0.714 | 10.239 | High |
| N09 | 1.667 | NDc | 1.000 | 1.500 | 0.400 | 1.000 | 0.683 | 6.250 | Moderate |
| N10 | 3.333 | 5.000 | 1.000 | NDc | 0.400 | 0.625 | 1.000 | 11.358 | High |
| N11 | 1.667 | NDc | 2.000 | 1.500 | 0.400 | 0.625 | 0.580 | 6.772 | Moderate |
| N12 | 1.667 | NDc | 1.000 | NDc | 0.400 | 0.500 | 0.430 | 3.997 | Low |
| N13 | 1.667 | 5.000 | 4.000 | 3.000 | 0.400 | 1.000 | 0.616 | 14.683 | High |
| N14 | 1.667 | NDc | 1.000 | 1.500 | 0.400 | 0.500 | 0.427 | 5.494 | Moderate |
| N15 | 1.667 | NDc | 1.000 | 3.000 | 0.800 | 0.875 | 0.522 | 7.864 | Moderate |
| N16 | 4.167 | NDc | 2.000 | 1.500 | 2.000 | 0.750 | 0.940 | 11.357 | High |
| N17 | 1.667 | 5.000 | 1.000 | NDc | 0.800 | 0.750 | 0.590 | 9.807 | High |
| N18 | 4.167 | NDc | 2.000 | 1.500 | 1.200 | 0.500 | 0.641 | 10.008 | High |
| N19 | 1.667 | NDc | 1.000 | NDc | 0.800 | 0.250 | 0.292 | 4.009 | Low |
| N20 | 4.167 | NDc | 2.000 | 1.500 | 1.200 | 0.500 | 0.716 | 10.083 | High |
| N21 | 4.167 | 5.000 | 2.000 | 1.500 | 1.200 | 0.500 | 0.664 | 15.031 | High |
| N22 | 4.167 | NDc | 2.000 | 1.500 | 0.800 | 0.375 | 0.663 | 9.505 | High |
| N23 | 4.167 | 5.000 | 2.000 | 1.500 | 0.800 | 0.625 | 0.697 | 14.789 | High |
| N24 | 4.167 | NDc | 2.000 | 1.500 | 1.200 | 0.375 | 0.609 | 9.851 | High |
| N25 | 5.000 | NDc | 2.000 | 1.500 | 2.000 | 1.000 | 0.959 | 12.459 | High |
| N26 | 4.167 | 5.000 | 2.000 | 1.500 | 0.800 | 1.000 | 0.723 | 15.190 | High |
| N27 | 1.667 | NDc | 1.000 | 1.500 | 0.400 | 0.625 | 0.715 | 5.907 | Moderate |
| N28 | 4.167 | NDc | 2.000 | 1.500 | 1.200 | 0.500 | 0.797 | 10.164 | High |
| N29 | 4.167 | 5.000 | 2.000 | 1.500 | 0.800 | 0.375 | 0.716 | 14.558 | High |
| N30 | 4.167 | NDc | 2.000 | 1.500 | 1.200 | 0.250 | 0.613 | 9.730 | High |
| N31 | 4.167 | 5.000 | 2.000 | 1.500 | 1.200 | 1.000 | 0.733 | 15.600 | High |
| N32 | 4.167 | NDc | 2.000 | 1.500 | 2.000 | 0.375 | 0.617 | 10.659 | High |
| **Maternal ID** | **Pb** | **As** | **Cr** | **Ni** | **Cu** | **Zn** | **Fe** | **WRST** | **Risk category** |
| IAM 1 | 2.083 | NDc | 2.000 | NDc | 0.600 | 0.875 | 0.628 | 6.186 | Moderate |
| IAM 2 | 2.083 | 3.750 | 1.000 | 1.800 | 0.600 | 0.625 | 0.556 | 10.414 | High |
| IAM 3 | 2.083 | 3.750 | 1.000 | NDc | 0.800 | 0.625 | 0.932 | 9.190 | High |
| IAM 4 | 2.083 | NDc | 1.000 | 1.800 | 0.600 | 1.000 | 0.640 | 7.123 | Moderate |
| IAM 5 | 2.083 | 3.750 | 1.000 | 1.800 | 0.600 | 0.500 | 0.598 | 10.331 | High |
| IAM 6 | 2.083 | NDc | 1.000 | NDc | 0.800 | 0.875 | 0.779 | 5.537 | Moderate |
| IAM 7 | 2.083 | 3.750 | 2.000 | 3.000 | 0.600 | 0.625 | 0.830 | 12.888 | High |
| IAM 8 | 2.917 | 2.500 | 1.000 | NDc | 0.600 | 0.625 | 0.714 | 8.356 | High |
| IAM 9 | 2.083 | NDc | 1.000 | 1.800 | 0.600 | 1.000 | 0.683 | 7.166 | Moderate |
| IAM 10 | 3.750 | 2.500 | 1.000 | NDc | 0.600 | 0.625 | 1.000 | 9.475 | High |
| IAM 11 | 2.083 | NDc | 2.000 | 1.800 | 0.600 | 0.625 | 0.580 | 7.688 | Moderate |
| IAM 12 | 2.083 | NDc | 1.000 | NDc | 0.600 | 0.500 | 0.430 | 4.613 | Moderate |
| IAM13 | 2.083 | 2.500 | 4.000 | 3.000 | 0.600 | 1.000 | 0.616 | 13.799 | High |
| IAM 14 | 2.083 | NDc | 1.000 | 1.800 | 0.600 | 0.500 | 0.427 | 6.410 | Moderate |
| IAM 15 | 2.083 | NDc | 1.000 | 3.000 | 0.800 | 0.875 | 0.522 | 8.280 | High |
| IAM 16 | 4.167 | NDc | 3.000 | 1.800 | 2.000 | 0.750 | 0.940 | 12.657 | High |
| IAM 17 | 2.083 | 5.000 | 1.000 | NDc | 1.000 | 0.750 | 0.590 | 10.423 | High |
| IAM 18 | 4.167 | NDc | 2.000 | 1.800 | 0.600 | 0.500 | 0.641 | 9.708 | High |
| IAM 19 | 2.083 | NDc | 1.500 | NDc | 1.000 | 0.250 | 0.292 | 5.125 | Moderate |
| IAM 20 | 4.167 | NDc | 2.000 | 1.800 | 1.200 | 0.500 | 0.716 | 10.383 | High |
| IAM 21 | 2.083 | 2.500 | 2.000 | 1.800 | 1.200 | 0.500 | 0.664 | 10.747 | High |
| IAM 22 | 2.083 | NDc | 2.000 | 2.400 | 0.800 | 0.375 | 0.663 | 8.321 | High |
| IAM 23 | 2.083 | 5.000 | 2.000 | 1.800 | 0.800 | 0.625 | 0.697 | 13.005 | High |
| IAM 24 | 2.083 | NDc | 2.000 | 1.800 | 1.200 | 0.375 | 0.609 | 8.067 | High |
| IAM 25 | 5.000 | NDc | 1.500 | 1.800 | 2.000 | 1.000 | 0.959 | 12.259 | High |
| IAM 26 | 4.167 | 2.500 | 2.000 | 3.000 | 0.800 | 1.000 | 0.723 | 14.190 | High |
| IAM 27 | 2.083 | NDc | 1.000 | 1.800 | 0.600 | 0.625 | 0.715 | 6.823 | Moderate |
| IAM 28 | 4.167 | NDc | 2.000 | 1.800 | 1.200 | 0.500 | 0.797 | 10.464 | High |
| IAM 29 | 4.167 | 2.500 | 2.000 | 1.800 | 0.800 | 0.375 | 0.716 | 12.358 | High |
| IAM 30 | 4.167 | NDc | 2.000 | 1.800 | 1.200 | 0.250 | 0.613 | 10.030 | High |
| IAM 31 | 4.167 | 2.500 | 2.000 | 2.400 | 1.200 | 1.000 | 0.733 | 14.000 | High |
| IAM 32 | 4.167 | NDc | 2.000 | 1.800 | 2.000 | 0.375 | 0.617 | 10.959 | High |

NDc: not detected/calculated.
